# Supplementary material
Source: PubMed Central journal article supplement (PMC4183919)
Supplement: Supp_Fig1.pdf [file Supp_Fig1.pdf]

## Supplementary Data

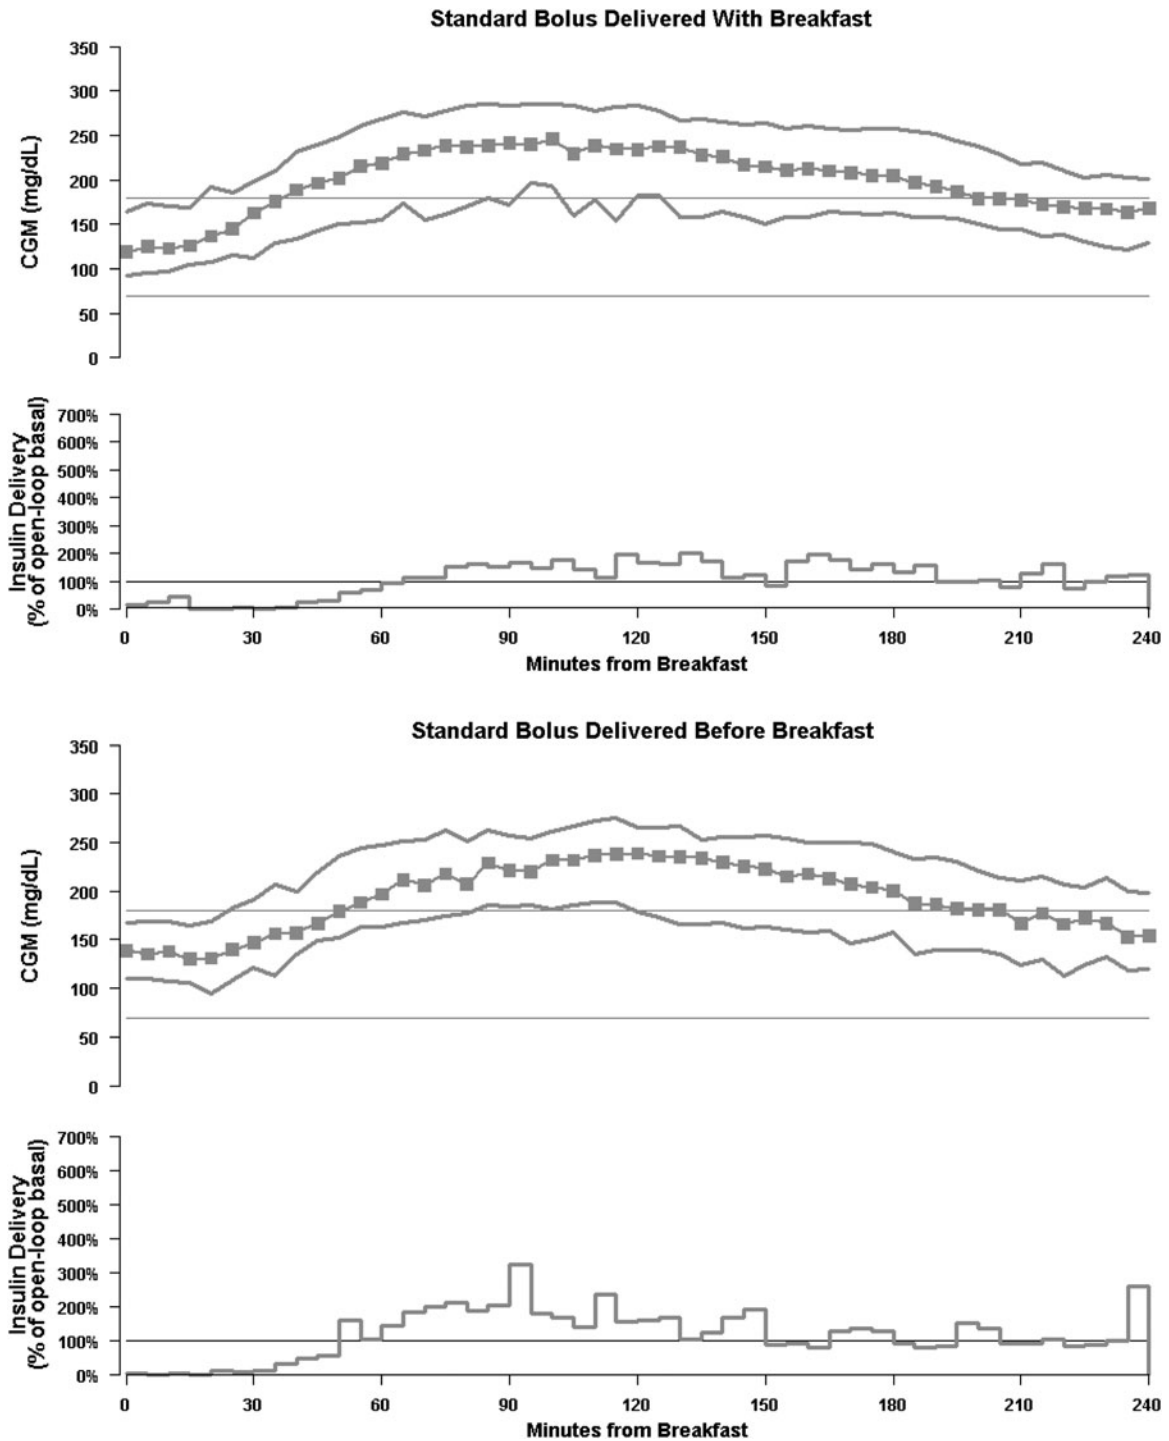

**SUPPLEMENTARY FIG. S1.** Continuous glucose monitor (CGM) values following standard bolus delivered with and before breakfast: (**top panels**) CGM glucose levels and (**bottom panels**) insulin delivery following breakfast. Lines with dots denote the median glucose level, lines without dots denote the 25<sup>th</sup> and 75<sup>th</sup> percentiles for glucose levels, and bars denote mean insulin delivery.
