# Supplementary material
Source: PubMed Central journal article supplement (PMC4183919)
Supplement: Supp_Fig2.pdf [file Supp_Fig2.pdf]

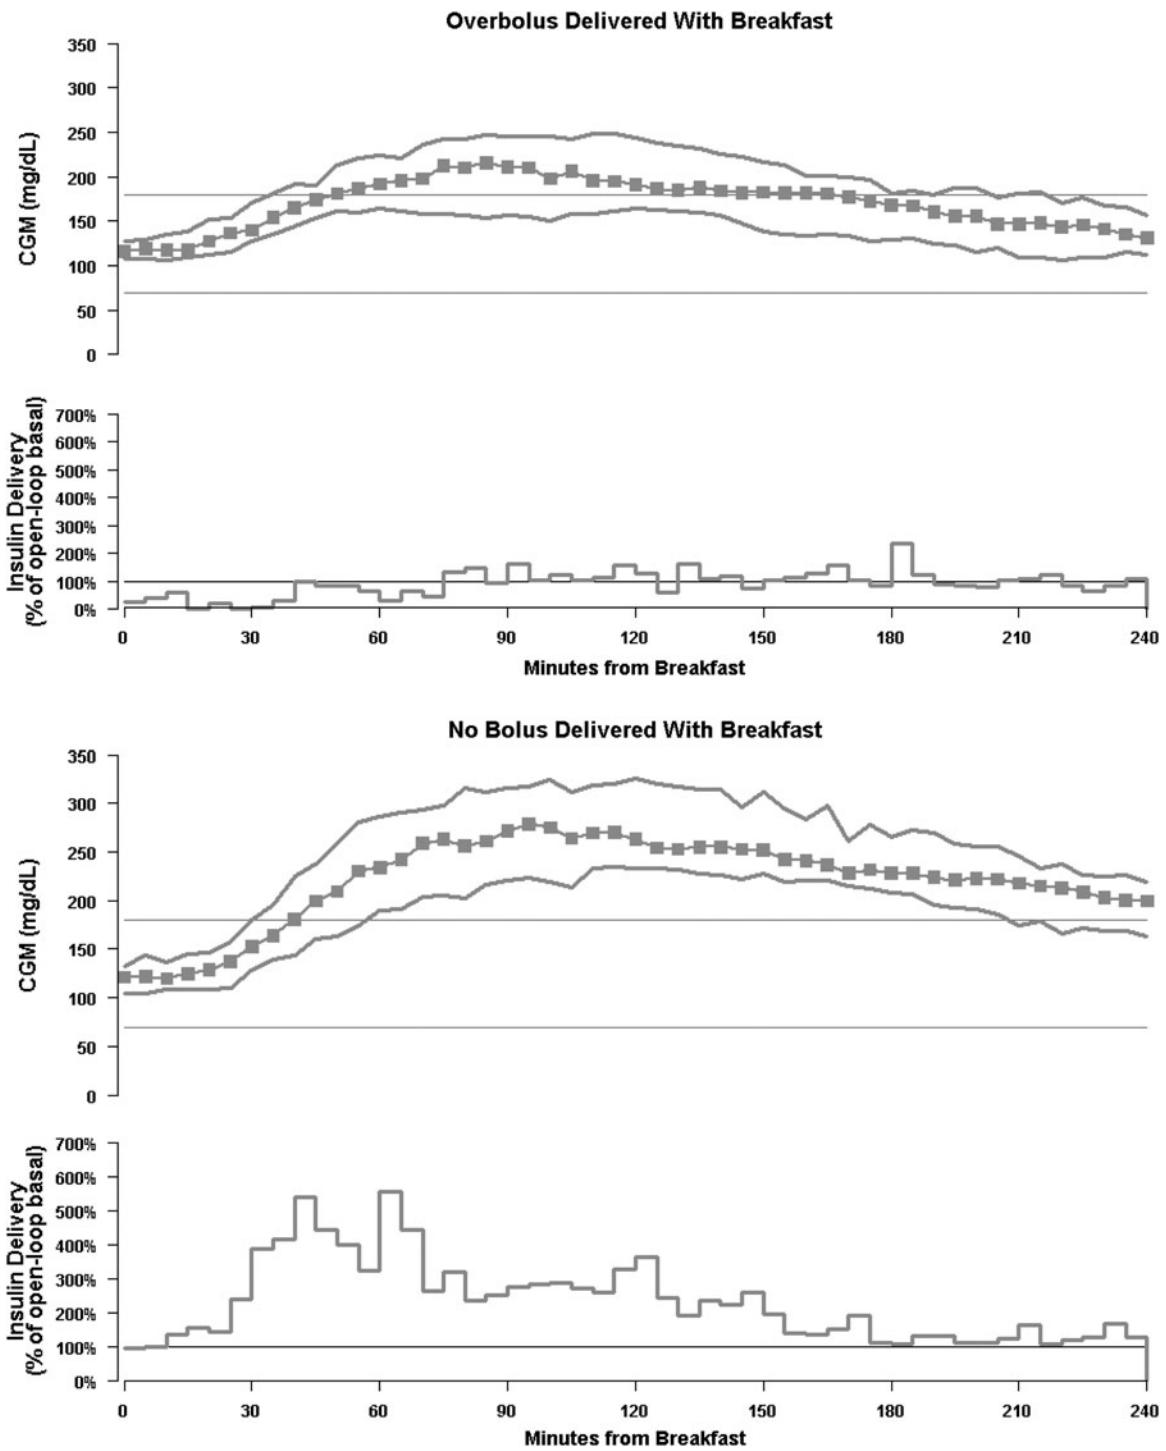

**SUPPLEMENTARY FIG. S2.** Continuous glucose monitor (CGM) values following over-bolus and no bolus delivered with breakfast: **(top panels)** CGM glucose levels and **(bottom panels)** insulin delivery following breakfast. Lines with dots denote the median glucose level, lines without dots denote the 25<sup>th</sup> and 75<sup>th</sup> percentiles of glucose levels, and bars denote mean insulin delivery.
