# Supplementary material
Source: PubMed Central journal article supplement (PMC4183919)
Supplement: Supp_Table1.pdf [file Supp_Table1.pdf]

SUPPLEMENTARY TABLE S1. DEMOGRAPHICS  
OF THE STUDY POPULATION

| <i>Characteristics</i>      | <i>Value</i> |
|-----------------------------|--------------|
| Number of participants      | 53           |
| Age (years)                 | 28 ± 15      |
| Male                        | 28 (53%)     |
| Race <sup>a</sup>           |              |
| White non-Hispanic          | 43 (93%)     |
| Hispanic                    | 2 (4%)       |
| African American            | 1 (2%)       |
| BMI (kg/m <sup>2</sup> )    | 24 ± 3       |
| T1D duration (years)        | 16 ± 12      |
| HbA1c (%)                   | 7.9 ± 0.8    |
| Total daily insulin (U/day) | 50 ± 16      |

Data are mean ± SD or number (%).

<sup>a</sup>Ethnicity was not collected for seven adult patients because of French laws.

BMI, body mass index; HbA1c, hemoglobin A1c; T1D, type 1 diabetes.
