# Supplementary material
Source: PubMed Central journal article supplement (PMC4183919)
Supplement: Supp_Table2.pdf [file Supp_Table2.pdf]

SUPPLEMENTARY TABLE S2. STANDARD BOLUS MEAL OUTCOMES STRATIFIED BY ADULTS AND ADOLESCENTS

|                                                                      | <i>Standard bolus delivered with meal</i> |                    | <i>Standard bolus delivered before meal</i> |                    |
|----------------------------------------------------------------------|-------------------------------------------|--------------------|---------------------------------------------|--------------------|
|                                                                      | <i>Adults</i>                             | <i>Adolescents</i> | <i>Adults</i>                               | <i>Adolescents</i> |
| Number of participants                                               | 23                                        | 19                 | 20                                          | 20                 |
| Number of breakfasts                                                 | 31                                        | 20                 | 20                                          | 20                 |
| Meal and insulin delivery characteristics                            |                                           |                    |                                             |                    |
| Meal size (g of CHO)                                                 | 68 (63, 80)                               | 60 (51, 77)        | 69 (62, 77)                                 | 61 (51, 75)        |
| Normalized meal size (g of CHO/kg of body weight)                    | 1.00 (0.99, 1.00)                         | 0.99 (0.98, 1.00)  | 1.00 (0.99, 1.01)                           | 0.99 (0.98, 1.00)  |
| Minutes from bolus to start of meal                                  | 0 (-1, +3)                                | -1 (-3, 0)         | -15 (-16, -14)                              | -16 (-17, -15)     |
| Meal bolus size (U)                                                  | 5.8 (4.7, 7.7)                            | 6.0 (5.4, 10.4)    | 6.0 (4.9, 7.9)                              | 6.6 (4.5, 9.9)     |
| Normalized meal bolus size (unitless) <sup>a</sup>                   | 0.96 (0.93, 0.97)                         | 0.96 (0.94, 0.97)  | 0.95 (0.93, 0.96)                           | 0.96 (0.96, 0.98)  |
| Cumulative basal insulin delivery at 4 h (% of open-loop basal)      | 109% (53%, 168%)                          | 99% (86%, 133%)    | 129% (89%, 168%)                            | 101% (68%, 138%)   |
| Cumulative basal plus bolus insulin delivery at 4 h (U) <sup>b</sup> | 9.9 (7.6, 11.8)                           | 12.3 (10.0, 16.7)  | 10.7 (9.3, 13.1)                            | 12.0 (9.7, 15.4)   |
| Glycemic outcomes                                                    |                                           |                    |                                             |                    |
| Metrics at start of meal                                             |                                           |                    |                                             |                    |
| Baseline glucose <sup>c</sup>                                        | 122 (101, 161)                            | 138 (98, 198)      | 145 (122, 177)                              | 168 (128, 195)     |
| Metrics over 4 h                                                     |                                           |                    |                                             |                    |
| Number of YSI measurements                                           | 11 (11, 11)                               | 11 (11, 11)        | 11 (11, 11)                                 | 11 (10, 11)        |
| % meals with a YSI value                                             |                                           |                    |                                             |                    |
| ≤ 60 mg/dL                                                           | 0                                         | 0                  | 1 (5%)                                      | 0                  |
| ≤ 70 mg/dL                                                           | 1 (3%)                                    | 1 (5%)             | 3 (15%)                                     | 0                  |
| > 180 mg/dL                                                          | 25 (81%)                                  | 18 (90%)           | 17 (85%)                                    | 18 (90%)           |
| > 250 mg/dL                                                          | 16 (52%)                                  | 12 (60%)           | 10 (50%)                                    | 10 (50%)           |
| > 300 mg/dL                                                          | 7 (23%)                                   | 8 (40%)            | 5 (25%)                                     | 7 (35%)            |
| > 400 mg/dL                                                          | 1 (3%)                                    | 0                  | 0                                           | 0                  |
| % of YSI values                                                      |                                           |                    |                                             |                    |
| ≤ 70 mg/dL                                                           | 0% (0%, 0%)                               | 0% (0%, 0%)        | 0% (0%, 0%)                                 | 0% (0%, 0%)        |
| 71–180 mg/dL                                                         | 45% (9%, 73%)                             | 19% (5%, 45%)      | 27% (18%, 43%)                              | 26% (5%, 57%)      |
| > 180 mg/dL                                                          | 55% (27%, 91%)                            | 81% (55%, 95%)     | 71% (43%, 82%)                              | 74% (43%, 95%)     |
| Mean glucose (mg/dL)                                                 | 181 (149, 244)                            | 226 (181, 256)     | 200 (173, 240)                              | 205 (160, 266)     |
| Glucose CV                                                           | 21% (15%, 27%)                            | 22% (17%, 24%)     | 22% (17%, 26%)                              | 17% (14%, 25%)     |
| Nadir (mg/dL)                                                        | 118 (98, 146)                             | 129 (105, 175)     | 132 (94, 161)                               | 136 (102, 182)     |
| Peak (mg/dL)                                                         | 258 (195, 294)                            | 271 (228, 322)     | 256 (217, 303)                              | 250 (212, 313)     |
| Excursion (peak minus baseline) <sup>c</sup>                         | 118 (70, 178)                             | 121 (70, 150)      | 106 (57, 159)                               | 104 (61, 129)      |
| Area under the curve                                                 | 22 (3, 64)                                | 48 (15, 77)        | 32 (11, 62)                                 | 28 (7, 91)         |
| 180 (mg/dL/min) <sup>d</sup>                                         |                                           |                    |                                             |                    |
| % of meals with a Hypoglycemia red light                             |                                           |                    |                                             |                    |
| Hypoglycemic treatment interventions <sup>e</sup>                    | 0                                         | 0                  | 1 (5%)                                      | 0                  |
| Hyperglycemic treatment interventions <sup>e</sup>                   | 1 (3%)                                    | 0                  | 0                                           | 0                  |
| Metrics at 4 h                                                       |                                           |                    |                                             |                    |
| Glucose at 4 h                                                       | 175 (136, 214)                            | 169 (126, 212)     | 171 (148, 199)                              | 181 (132, 219)     |
| % of meals with a YSI value at 4 h                                   |                                           |                    |                                             |                    |
| ≤ 60 mg/dL                                                           | 0                                         | 0                  | 0                                           | 0                  |
| ≤ 70 mg/dL                                                           | 0                                         | 0                  | 0                                           | 0                  |
| 71–180 mg/dL                                                         | 16 (52%)                                  | 11 (55%)           | 12 (60%)                                    | 10 (50%)           |
| > 180 mg/dL                                                          | 15 (48%)                                  | 9 (45%)            | 8 (40%)                                     | 10 (50%)           |
| > 250 mg/dL                                                          | 4 (13%)                                   | 1 (5%)             | 2 (10%)                                     | 2 (10%)            |
| > 300 mg/dL                                                          | 1 (3%)                                    | 1 (5%)             | 0                                           | 0                  |
| > 400 mg/dL                                                          | 0                                         | 0                  | 0                                           | 0                  |

Data are median (25<sup>th</sup>, 75<sup>th</sup> percentiles) or *n* (%).

<sup>a</sup>Bolus<sub>NORM</sub> = (bolus<sub>ACTUAL</sub> × carbohydrate ratio)/meal size.

<sup>b</sup>Includes the meal boluses, correction boluses, and insulin delivered by the controller.

<sup>c</sup>Five baseline YSI values and excursions were missing (three with standard bolus delivered with meal, two with standard bolus delivered before meal).

<sup>d</sup>Area under the curve calculated for each meal and divided by the time.

<sup>e</sup>Hypoglycemic treatments preceded by a red light were not counted as an intervention, and YSI values were not imputed. CHO, carbohydrate; CV, coefficient of variation.
