# Supplementary material
Source: PubMed Central journal article supplement (PMC4183919)
Supplement: Supp_Table3.pdf [file Supp_Table3.pdf]

SUPPLEMENTARY TABLE S3. OVER-BOLUS AND NO BOLUS MEAL OUTCOMES STRATIFIED BY ADULTS AND ADOLESCENTS

|                                                                      | <i>Over-bolus delivered with meal</i> |                    | <i>No bolus delivered with meal</i> |                    |
|----------------------------------------------------------------------|---------------------------------------|--------------------|-------------------------------------|--------------------|
|                                                                      | <i>Adults</i>                         | <i>Adolescents</i> | <i>Adults</i>                       | <i>Adolescents</i> |
| Number of participants                                               | 18                                    | 22                 | 25                                  | 21                 |
| Number of breakfasts                                                 | 18                                    | 22                 | 25                                  | 21                 |
| Meal and insulin delivery characteristics                            |                                       |                    |                                     |                    |
| Meal size (g of CHO)                                                 | 68 (63, 75)                           | 58 (50, 75)        | 50 (50, 50)                         | 50 (50, 51)        |
| Normalized meal size (g of CHO/kg of body weight)                    | 1.00 (0.95, 1.00)                     | 0.99 (0.93, 1.00)  | 0.73 (0.64, 0.79)                   | 0.83 (0.64, 0.99)  |
| Minutes from bolus to start of meal                                  | +1 (0, +1)                            | 0 (-3, +1)         | —                                   | —                  |
| Meal bolus size (U)                                                  | 7.5 (6.0, 10.2)                       | 7.1 (5.9, 10.4)    | —                                   | —                  |
| Normalized meal bolus size (unitless) <sup>a</sup>                   | 1.24 (1.23, 1.25)                     | 1.24 (1.20, 1.28)  | —                                   | —                  |
| Cumulative basal insulin delivery at 4 h (% of open-loop basal)      | 87% (54%, 95%)                        | 73% (52%, 118%)    | 212% (172%, 243%)                   | 196% (173%, 251%)  |
| Cumulative basal plus bolus insulin delivery at 4 h (U) <sup>b</sup> | 10.3 (8.7, 15.1)                      | 13.6 (10.7, 14.5)  | 7.9 (6.9, 10.0)                     | 9.8 (8.9, 13.0)    |
| Glycemic outcomes                                                    |                                       |                    |                                     |                    |
| Metrics at start of meal                                             |                                       |                    |                                     |                    |
| Baseline glucose <sup>c</sup>                                        | 120 (108, 133)                        | 130 (116, 144)     | 128 (119, 152)                      | 122 (112, 140)     |
| Metrics over 4 h                                                     |                                       |                    |                                     |                    |
| Number of YSI measurements                                           | 11 (10, 11)                           | 11 (11, 11)        | 11 (11, 11)                         | 11 (10, 11)        |
| % of meals with a YSI value                                          |                                       |                    |                                     |                    |
| ≤ 60 mg/dL                                                           | 1 (6%)                                | 1 (5%)             | 0                                   | 0                  |
| ≤ 70 mg/dL                                                           | 1 (6%)                                | 1 (5%)             | 0                                   | 0                  |
| > 180 mg/dL                                                          | 13 (72%)                              | 18 (82%)           | 23 (92%)                            | 21 (100%)          |
| > 250 mg/dL                                                          | 4 (22%)                               | 6 (27%)            | 18 (72%)                            | 19 (90%)           |
| > 300 mg/dL                                                          | 3 (17%)                               | 2 (9%)             | 9 (36%)                             | 10 (48%)           |
| > 400 mg/dL                                                          | 1 (6%)                                | 1 (5%)             | 0                                   | 0                  |
| % of YSI values                                                      |                                       |                    |                                     |                    |
| ≤ 70 mg/dL                                                           | 0% (0%, 0%)                           | 0% (0%, 0%)        | 0% (0%, 0%)                         | 0% (0%, 0%)        |
| 71–180 mg/dL                                                         | 63% (27%, 100%)                       | 50% (36%, 80%)     | 18% (18%, 36%)                      | 11% (9%, 27%)      |
| > 180 mg/dL                                                          | 37% (0%, 73%)                         | 45% (10%, 64%)     | 82% (64%, 82%)                      | 89% (73%, 91%)     |
| Mean glucose (mg/dL)                                                 | 166 (139, 205)                        | 179 (155, 207)     | 228 (210, 239)                      | 236 (208, 248)     |
| Glucose CV                                                           | 17% (13%, 24%)                        | 19% (15%, 28%)     | 21% (17%, 25%)                      | 21% (19%, 24%)     |
| Nadir (mg/dL)                                                        | 118 (92, 138)                         | 113 (102, 137)     | 144 (123, 151)                      | 131 (121, 149)     |
| Peak (mg/dL)                                                         | 209 (174, 240)                        | 228 (183, 262)     | 281 (248, 305)                      | 295 (270, 320)     |
| Excursion (peak minus baseline) <sup>c</sup>                         | 110 (69, 136)                         | 99 (62, 123)       | 137 (108, 165)                      | 171 (152, 188)     |
| Area under the curve 180 (mg/dL/min) <sup>d</sup>                    | 8 (0, 26)                             | 15 (0, 36)         | 53 (41, 62)                         | 63 (37, 70)        |
| % of meals with a                                                    |                                       |                    |                                     |                    |
| Hypoglycemia red light                                               | 3 (17%)                               | 5 (23%)            | 3 (12%)                             | 0                  |
| Hypoglycemic treatment interventions <sup>e</sup>                    | 0                                     | 1 (5%)             | 0                                   | 0                  |
| Hyperglycemic treatment interventions <sup>e</sup>                   | 1 (6%)                                | 1 (5%)             | 0                                   | 0                  |
| Metrics at 4 h                                                       |                                       |                    |                                     |                    |
| Glucose at 4 h                                                       | 151 (118, 197)                        | 143 (102, 163)     | 198 (161, 221)                      | 210 (188, 226)     |
| % of meals with a YSI value at 4 h                                   |                                       |                    |                                     |                    |
| ≤ 60 mg/dL                                                           | 0                                     | 1 (5%)             | 0                                   | 0                  |
| ≤ 70 mg/dL                                                           | 0                                     | 1 (5%)             | 0                                   | 0                  |
| 71–180 mg/dL                                                         | 13 (72%)                              | 18 (82%)           | 11 (44%)                            | 5 (24%)            |
| > 180 mg/dL                                                          | 5 (28%)                               | 3 (14%)            | 14 (56%)                            | 16 (76%)           |
| > 250 mg/dL                                                          | 1 (6%)                                | 1 (5%)             | 3 (12%)                             | 2 (10%)            |
| > 300 mg/dL                                                          | 1 (6%)                                | 1 (5%)             | 0                                   | 1 (5%)             |
| > 400 mg/dL                                                          | 0                                     | 0                  | 0                                   | 0                  |

Data are median (25<sup>th</sup>, 75<sup>th</sup> percentiles) or *n* (%) as indicated.

<sup>a</sup>Bolus<sub>NORM</sub> = (bolus<sub>ACTUAL</sub> × carbohydrate ratio)/meal size.

<sup>b</sup>Includes the meal boluses, correction boluses, and insulin delivered by the controller.

<sup>c</sup>Six baseline YSI values and excursions were missing (three with over-bolus delivered with meal and three with no bolus delivered with meal).

<sup>d</sup>Area under the curve calculated for each meal and divided by the time.

<sup>e</sup>Hypoglycemic treatments preceded by a red light were not counted as an intervention, and YSI values were not imputed.

CHO, carbohydrate; CV, coefficient of variation.
