# Supplementary material
Source: PubMed Central journal article supplement (PMC4183919)
Supplement: Supp_Table4.pdf [file Supp_Table4.pdf]

SUPPLEMENTARY TABLE S4. CONTINUOUS GLUCOSE MONITOR ACCURACY DURING MEALS ACCORDING TO YSI VALUE

|                   | n    | Median difference (mg/dL) | Median AD <sup>a</sup> | Median RAD <sup>b</sup> | Mean RAD <sup>b</sup> | % ISO <sup>c</sup> |
|-------------------|------|---------------------------|------------------------|-------------------------|-----------------------|--------------------|
| Total             | 1901 | -8 (-26, +9)              | 20 (9, 35)             | 10% (5%, 17%)           | 13% ± 10%             | 81%                |
| YSI value (mg/dL) |      |                           |                        |                         |                       |                    |
| ≤70               | 19   | +1 (-5, +18)              | 15 (2, 19)             | 23% (3%, 32%)           | 20% ± 15%             | 53%                |
| 71-120            | 211  | -1 (-11, +9)              | 10 (4, 19)             | 10% (4%, 19%)           | 13% ± 12%             | 78%                |
| 121-180           | 587  | -6 (-21, +8)              | 16 (7, 29)             | 10% (4%, 19%)           | 13% ± 11%             | 79%                |
| 181-250           | 642  | -10 (-26, +13)            | 22 (11, 37)            | 10% (5%, 17%)           | 13% ± 11%             | 81%                |
| >250              | 442  | -22 (-42, +4)             | 30 (15, 46)            | 10% (5%, 16%)           | 11% ± 8%              | 86%                |

Data are median (25<sup>th</sup>, 75<sup>th</sup> percentiles) or mean ± SD values as indicated.

<sup>a</sup>Absolute difference (AD) = absolute value of the difference (continuous glucose monitor – reference).

<sup>b</sup>Relative AD (RAD) = AD/reference.

<sup>c</sup>International Organization for Standardization (ISO) criteria are continuous glucose monitor measurements within ± 15 mg/dL for YSI values ≤75 mg/dL and within ± 20% for YSI values >75 mg/dL.
