# Supplementary material
Source: PubMed Central journal article supplement (PMC4183919)
Supplement: Supp_Table5.pdf [file Supp_Table5.pdf]

SUPPLEMENTARY TABLE S5. INTRASUBJECT GLYCEMIC DIFFERENCES BETWEEN BREAKFAST SCENARIOS

|                                                                             | <i>Altered bolus breakfast compared with standard bolus breakfast<sup>a</sup></i> |                                       |                                     |
|-----------------------------------------------------------------------------|-----------------------------------------------------------------------------------|---------------------------------------|-------------------------------------|
|                                                                             | <i>Standard bolus delivered before meal</i>                                       | <i>Over-bolus delivered with meal</i> | <i>No bolus delivered with meal</i> |
| Number of participants                                                      | 30                                                                                | 32                                    | 38                                  |
| Insulin delivery characteristics                                            |                                                                                   |                                       |                                     |
| Cumulative basal insulin delivery at 4 h (% of open-loop basal)             | +11% (-36%, +83%)                                                                 | -29% (-60%, -9%)                      | +88% (+55%, +156%)                  |
| Cumulative basal plus bolus insulin delivery at 4 h (U) <sup>b</sup>        | +0.6 (-1.3, +2.7)                                                                 | +0.9 (-0.8, +2.2)                     | -1.6 (-4.3, -0.6)                   |
| Glycemic outcomes                                                           |                                                                                   |                                       |                                     |
| Metrics at start of meal                                                    |                                                                                   |                                       |                                     |
| Baseline glucose <sup>c</sup>                                               | +13 (-11, +62)                                                                    | -27 (-52, +27)                        | -6 (-56, +34)                       |
| Metrics over 4 h                                                            |                                                                                   |                                       |                                     |
| Number of patients with a YSI value ≤60 mg/dL                               |                                                                                   |                                       |                                     |
| Standard bolus only                                                         | 0                                                                                 | 0                                     | 0                                   |
| Same outcome <sup>d</sup>                                                   | 29 (97%)                                                                          | 30 (94%)                              | 38 (100%)                           |
| Altered bolus only                                                          | 1 (3%)                                                                            | 2 (6%)                                | 0                                   |
| Number of patients with a YSI value ≤70 mg/dL                               |                                                                                   |                                       |                                     |
| Standard bolus only                                                         | 2 (7%)                                                                            | 1 (3%)                                | 1 (3%)                              |
| Same outcome                                                                | 25 (83%)                                                                          | 29 (91%)                              | 37 (97%)                            |
| Altered bolus only                                                          | 3 (10%)                                                                           | 2 (6%)                                | 0                                   |
| Number of patients with a YSI value >180 mg/dL                              |                                                                                   |                                       |                                     |
| Standard bolus only                                                         | 2 (7%)                                                                            | 6 (19%)                               | 1 (3%)                              |
| Same outcome                                                                | 25 (83%)                                                                          | 25 (78%)                              | 33 (87%)                            |
| Altered bolus only                                                          | 3 (10%)                                                                           | 1 (3%)                                | 4 (11%)                             |
| Number of patients with a YSI value >250 mg/dL                              |                                                                                   |                                       |                                     |
| Standard bolus only                                                         | 9 (30%)                                                                           | 10 (31%)                              | 1 (3%)                              |
| Same outcome                                                                | 13 (43%)                                                                          | 22 (69%)                              | 25 (66%)                            |
| Altered bolus only                                                          | 8 (27%)                                                                           | 0                                     | 12 (32%)                            |
| Number of patients with a YSI value >300 mg/dL                              |                                                                                   |                                       |                                     |
| Standard bolus only                                                         | 7 (23%)                                                                           | 9 (28%)                               | 5 (13%)                             |
| Same outcome                                                                | 20 (67%)                                                                          | 22 (69%)                              | 25 (66%)                            |
| Altered bolus only                                                          | 3 (10%)                                                                           | 1 (3%)                                | 8 (21%)                             |
| Number of patients with a YSI value >400 mg/dL                              |                                                                                   |                                       |                                     |
| Standard bolus only                                                         | 1 (3%)                                                                            | 0                                     | 1 (3%)                              |
| Same outcome                                                                | 29 (97%)                                                                          | 31 (97%)                              | 37 (97%)                            |
| Altered bolus only                                                          | 0                                                                                 | 1 (3%)                                | 0                                   |
| % of YSI values                                                             |                                                                                   |                                       |                                     |
| 70 mg/dL                                                                    | 0% (0%, 0%)                                                                       | 0% (0%, 0%)                           | 0% (0%, 0%)                         |
| 71–180 mg/dL                                                                | -4% (-36%, +27%)                                                                  | +27% (0%, +45%)                       | 0% (-27%, +10%)                     |
| >180 mg/dL                                                                  | 0% (-27%, +43%)                                                                   | -32% (-45%, -7%)                      | 0% (-10%, +35%)                     |
| Mean glucose (mg/dL)                                                        | 0 (-54, +48)                                                                      | -38 (-78, -8)                         | +2 (-26, +54)                       |
| Glucose CV                                                                  | +2% (-5%, +7%)                                                                    | +1% (-7%, +8%)                        | +1% (-4%, +8%)                      |
| Nadir (mg/dL)                                                               | -10 (-44, +32)                                                                    | -21 (-58, -1)                         | -1 (-49, +40)                       |
| Peak (mg/dL)                                                                | +5 (-88, +60)                                                                     | -43 (-78, -10)                        | 8 (-25, +67)                        |
| Excursion (peak minus baseline) <sup>c</sup>                                | -23 (-75, +36)                                                                    | -25 (-58, +17)                        | +25 (-19, +75)                      |
| Area under the curve 180 (mg/dL/min) <sup>e</sup>                           | +3 (-40, +32)                                                                     | -23 (-55, -1)                         | 0 (-24, +37)                        |
| Number of patients with a hypoglycemia red light                            |                                                                                   |                                       |                                     |
| Standard bolus only                                                         | 3 (10%)                                                                           | 5 (16%)                               | 4 (11%)                             |
| Same outcome                                                                | 23 (77%)                                                                          | 22 (69%)                              | 32 (84%)                            |
| Altered bolus only                                                          | 4 (13%)                                                                           | 5 (16%)                               | 2 (5%)                              |
| Number of patients with a hypoglycemic treatment intervention <sup>f</sup>  |                                                                                   |                                       |                                     |
| Standard bolus only                                                         | 0                                                                                 | 0                                     | 0                                   |
| Same outcome                                                                | 29 (97%)                                                                          | 31 (97%)                              | 38 (100%)                           |
| Altered bolus only                                                          | 1 (3%)                                                                            | 1 (3%)                                | 0                                   |
| Number of patients with a hyperglycemic treatment intervention <sup>f</sup> |                                                                                   |                                       |                                     |
| Standard bolus only                                                         | 1 (3%)                                                                            | 1 (3%)                                | 1 (3%)                              |
| Same outcome                                                                | 29 (97%)                                                                          | 29 (91%)                              | 37 (97%)                            |
| Altered bolus only                                                          | 0                                                                                 | 2 (6%)                                | 0                                   |

(continued)

SUPPLEMENTARY TABLE S5. (CONTINUED)

|                                                    | <i>Altered bolus breakfast compared with standard bolus breakfast<sup>a</sup></i> |                                       |                                     |
|----------------------------------------------------|-----------------------------------------------------------------------------------|---------------------------------------|-------------------------------------|
|                                                    | <i>Standard bolus delivered before meal</i>                                       | <i>Over-bolus delivered with meal</i> | <i>No bolus delivered with meal</i> |
| Metrics at 4 h                                     |                                                                                   |                                       |                                     |
| Glucose at 4 h                                     | -9 (-44, +51)                                                                     | -39 (-84, -1)                         | +23 (-39, +62)                      |
| % of patients with a YSI value ≤60 mg/dL at 4 h    |                                                                                   |                                       |                                     |
| Standard bolus only                                | 0                                                                                 | 0                                     | 0                                   |
| Same outcome                                       | 30 (100%)                                                                         | 31 (97%)                              | 38 (100%)                           |
| Altered bolus only                                 | 0                                                                                 | 1 (3%)                                | 0                                   |
| % of patients with a YSI value ≤70 mg/dL at 4 h    |                                                                                   |                                       |                                     |
| Standard bolus only                                | 0                                                                                 | 0                                     | 0                                   |
| Same outcome                                       | 30 (100%)                                                                         | 31 (97%)                              | 38 (100%)                           |
| Altered bolus only                                 | 0                                                                                 | 1 (3%)                                | 0                                   |
| % of patients with a YSI value 71–180 mg/dL at 4 h |                                                                                   |                                       |                                     |
| Standard bolus only                                | 7 (23%)                                                                           | 1 (3%)                                | 10 (26%)                            |
| Same outcome                                       | 17 (57%)                                                                          | 19 (59%)                              | 25 (66%)                            |
| Altered bolus only                                 | 6 (20%)                                                                           | 12 (38%)                              | 3 (8%)                              |
| % of patients with a YSI value >180 mg/dL at 4 h   |                                                                                   |                                       |                                     |
| Standard bolus only                                | 6 (20%)                                                                           | 12 (38%)                              | 3 (8%)                              |
| Same outcome                                       | 17 (57%)                                                                          | 20 (63%)                              | 25 (66%)                            |
| Altered bolus only                                 | 7 (23%)                                                                           | 0                                     | 10 (26%)                            |
| % of patients with a YSI value >250 mg/dL at 4 h   |                                                                                   |                                       |                                     |
| Standard bolus only                                | 3 (10%)                                                                           | 3 (9%)                                | 2 (5%)                              |
| Same outcome                                       | 26 (87%)                                                                          | 28 (88%)                              | 33 (87%)                            |
| Altered bolus only                                 | 1 (3%)                                                                            | 1 (3%)                                | 3 (8%)                              |
| % of patients with a YSI value >300 mg/dL at 4 h   |                                                                                   |                                       |                                     |
| Standard bolus only                                | 2 (7%)                                                                            | 2 (6%)                                | 2 (5%)                              |
| Same outcome                                       | 28 (93%)                                                                          | 28 (88%)                              | 35 (92%)                            |
| Altered bolus only                                 | 0                                                                                 | 2 (6%)                                | 1 (3%)                              |
| % of patients with a YSI value >400 mg/dL at 4 h   |                                                                                   |                                       |                                     |
| Standard bolus only                                | 0                                                                                 | 0                                     | 0                                   |
| Same outcome                                       | 30 (100%)                                                                         | 32 (100%)                             | 38 (100%)                           |
| Altered bolus only                                 | 0                                                                                 | 0                                     | 0                                   |

Data are median (25<sup>th</sup>, 75<sup>th</sup> percentiles) or *n* (%).

<sup>a</sup>Altered bolus outcome – standard bolus outcome

<sup>b</sup>Includes the meal boluses, correction boluses, and insulin delivered by the controller.

<sup>c</sup>Ten baseline YSI values and excursions were missing (two with standard bolus delivered before meal, four with over-bolus delivered with meal, and four with no bolus delivered with meal).

<sup>d</sup>Same outcome means standard bolus and altered bolus both had the event or both did not have the event.

<sup>e</sup>Area under the curve calculated for each meal and divided by the time.

<sup>f</sup>Hypoglycemic treatments preceded by a red light were not counted as an intervention, and YSI values were not imputed. CV, coefficient of variation.
