# Supplementary material
Source: PubMed Central journal article supplement (PMC4183919)
Supplement: Supp_Table6.pdf [file Supp_Table6.pdf]

SUPPLEMENTARY TABLE S6. STANDARD BOLUS MEAL OUTCOMES STRATIFIED BY BASELINE GLUCOSE

|                                                                      | Baseline glucose ≤ 130 mg/dL       |                                      | Baseline glucose 131–180 mg/dL     |                                      | Baseline glucose ≥ 181 mg/dL       |                                      |
|----------------------------------------------------------------------|------------------------------------|--------------------------------------|------------------------------------|--------------------------------------|------------------------------------|--------------------------------------|
|                                                                      | Standard bolus delivered with meal | Standard bolus delivered before meal | Standard bolus delivered with meal | Standard bolus delivered before meal | Standard bolus delivered with meal | Standard bolus delivered before meal |
| Number of breakfasts                                                 | 27                                 | 11                                   | 11                                 | 18                                   | 10                                 | 9                                    |
| Meal and insulin delivery characteristics                            |                                    |                                      |                                    |                                      |                                    |                                      |
| Meal size (g of CHO)                                                 | 68 (60, 80)                        | 70 (61, 80)                          | 65 (63, 75)                        | 63 (53, 75)                          | 67 (60, 78)                        | 60 (51, 72)                          |
| Normalized meal size (g of CHO/kg if body weight)                    | 1.00 (0.99, 1.00)                  | 1.00 (0.98, 1.02)                    | 0.99 (0.98, 1.00)                  | 1.00 (0.98, 1.00)                    | 0.98 (0.95, 0.99)                  | 0.99 (0.95, 1.00)                    |
| Minutes from bolus to start of meal                                  | 0 (-2, +1)                         | -15 (-17, -14)                       | -1 (-4, 0)                         | -15 (-17, -14)                       | -1 (-3, 0)                         | -15 (-16, -14)                       |
| Meal bolus size (U)                                                  | 5.9 (5.2, 8.8)                     | 7.6 (5.1, 10.3)                      | 5.6 (4.4, 6.0)                     | 6.0 (4.9, 8.3)                       | 8.5 (6.0, 10.8)                    | 5.4 (4.1, 5.8)                       |
| Normalized meal bolus size (unitless) <sup>a</sup>                   | 0.95 (0.93, 0.96)                  | 0.96 (0.95, 0.96)                    | 0.97 (0.95, 0.97)                  | 0.96 (0.95, 0.97)                    | 0.96 (0.95, 0.96)                  | 0.96 (0.96, 0.97)                    |
| Cumulative basal insulin delivery at 4 h (% of open-loop basal)      | 86% (53%, 123%)                    | 72% (53%, 119%)                      | 134% (85%, 204%)                   | 113% (78%, 162%)                     | 118% (95%, 158%)                   | 145% (119%, 166%)                    |
| Cumulative basal plus bolus insulin delivery at 4 h (U) <sup>b</sup> | 9.9 (7.6, 11.8)                    | 11.5 (8.6, 14.0)                     | 10.8 (6.4, 12.7)                   | 11.3 (10.0, 13.4)                    | 13.6 (10.8, 17.4)                  | 10.7 (8.6, 16.8)                     |
| Glycemic outcomes                                                    |                                    |                                      |                                    |                                      |                                    |                                      |
| Metrics at start of meal                                             |                                    |                                      |                                    |                                      |                                    |                                      |
| Baseline glucose                                                     | 104 (93, 119)                      | 112 (105, 122)                       | 170 (147, 174)                     | 157 (140, 170)                       | 202 (197, 209)                     | 196 (191, 211)                       |
| Metrics over 4 h                                                     |                                    |                                      |                                    |                                      |                                    |                                      |
| Number of YSI measurements                                           | 11 (11, 11)                        | 11 (11, 11)                          | 11 (11, 11)                        | 11 (11, 11)                          | 11 (10, 11)                        | 11 (11, 11)                          |
| % of meals with a YSI value                                          |                                    |                                      |                                    |                                      |                                    |                                      |
| ≤ 60 mg/dL                                                           | 0                                  | 1 (9%)                               | 0                                  | 0                                    | 0                                  | 0                                    |
| ≤ 70 mg/dL                                                           | 2 (7%)                             | 3 (27%)                              | 0                                  | 0                                    | 0                                  | 0                                    |
| > 180 mg/dL                                                          | 20 (74%)                           | 7 (64%)                              | 11 (100%)                          | 17 (94%)                             | 10 (100%)                          | 9 (100%)                             |
| > 250 mg/dL                                                          | 11 (41%)                           | 2 (18%)                              | 7 (64%)                            | 10 (56%)                             | 8 (80%)                            | 7 (78%)                              |
| > 300 mg/dL                                                          | 4 (15%)                            | 0                                    | 5 (45%)                            | 7 (39%)                              | 5 (50%)                            | 5 (56%)                              |
| > 400 mg/dL                                                          | 0                                  | 0                                    | 0                                  | 0                                    | 1 (10%)                            | 0                                    |
| % of YSI values                                                      |                                    |                                      |                                    |                                      |                                    |                                      |
| ≤ 70 mg/dL                                                           | 0% (0%, 0%)                        | 0% (0%, 9%)                          | 0% (0%, 0%)                        | 0% (0%, 0%)                          | 0% (0%, 0%)                        | 0% (0%, 0%)                          |
| 71–180 mg/dL                                                         | 45% (27%, 91%)                     | 55% (27%, 91%)                       | 18% (0%, 64%)                      | 26% (9%, 60%)                        | 0% (0%, 9%)                        | 0% (0%, 18%)                         |
| > 180 mg/dL                                                          | 55% (0%, 73%)                      | 45% (0%, 64%)                        | 82% (36%, 100%)                    | 74% (40%, 91%)                       | 100% (91%, 100%)                   | 100% (82%, 100%)                     |
| Mean glucose (mg/dL)                                                 | 177 (133, 221)                     | 162 (112, 184)                       | 236 (173, 259)                     | 216 (173, 250)                       | 260 (218, 274)                     | 262 (220, 280)                       |
| Glucose CV                                                           | 23% (19%, 28%)                     | 24% (22%, 35%)                       | 22% (14%, 23%)                     | 20% (17%, 22%)                       | 16% (13%, 19%)                     | 16% (10%, 18%)                       |
| Nadir (mg/dL)                                                        | 102 (94, 125)                      | 93 (70, 111)                         | 160 (130, 194)                     | 143 (129, 177)                       | 195 (152, 208)                     | 187 (170, 196)                       |
| Peak (mg/dL)                                                         | 233 (175, 283)                     | 216 (174, 246)                       | 281 (210, 329)                     | 269 (239, 312)                       | 309 (261, 334)                     | 302 (252, 324)                       |
| Excursion (peak minus baseline)                                      | 131 (82, 171)                      | 100 (57, 128)                        | 106 (58, 185)                      | 113 (75, 155)                        | 99 (56, 127)                       | 91 (61, 121)                         |
| Area under the curve 180 (mg/dL/min) <sup>c</sup>                    | 18 (0, 48)                         | 8 (0, 26)                            | 59 (7, 79)                         | 42 (15, 73)                          | 80 (38, 94)                        | 91 (41, 100)                         |
| % meals with a                                                       |                                    |                                      |                                    |                                      |                                    |                                      |
| Hypoglycemia red light                                               | 6 (22%)                            | 3 (27%)                              | 1 (9%)                             | 2 (11%)                              | 1 (10%)                            | 0                                    |
| Hypoglycemic treatment interventions <sup>d</sup>                    | 0                                  | 1 (9%)                               | 0                                  | 0                                    | 0                                  | 0                                    |
| Hyperglycemic treatment interventions <sup>d</sup>                   | 0                                  | 0                                    | 1 (9%)                             | 0                                    | 0                                  | 0                                    |

(continued)

SUPPLEMENTARY TABLE S6. (CONTINUED)

|                                    | Baseline glucose $\leq 130$ mg/dL  |                                      | Baseline glucose 131–180 mg/dL     |                                      | Baseline glucose $\geq 181$ mg/dL  |                                      |
|------------------------------------|------------------------------------|--------------------------------------|------------------------------------|--------------------------------------|------------------------------------|--------------------------------------|
|                                    | Standard bolus delivered with meal | Standard bolus delivered before meal | Standard bolus delivered with meal | Standard bolus delivered before meal | Standard bolus delivered with meal | Standard bolus delivered before meal |
| Metrics at 4 h                     | 158 (114, 191)                     | 170 (133, 193)                       | 203 (149, 219)                     | 162 (133, 211)                       | 196 (152, 213)                     | 204 (193, 237)                       |
| Glucose at 4 h                     |                                    |                                      |                                    |                                      |                                    |                                      |
| % of meals with a YSI value at 4 h |                                    |                                      |                                    |                                      |                                    |                                      |
| $\leq 60$ mg/dL                    | 0                                  | 0                                    | 0                                  | 0                                    | 0                                  | 0                                    |
| $\leq 70$ mg/dL                    | 0                                  | 0                                    | 0                                  | 0                                    | 0                                  | 0                                    |
| 71–180 mg/dL                       | 19 (70%)                           | 7 (64%)                              | 4 (36%)                            | 11 (61%)                             | 3 (30%)                            | 2 (22%)                              |
| > 180 mg/dL                        | 8 (30%)                            | 4 (36%)                              | 7 (64%)                            | 7 (39%)                              | 7 (70%)                            | 7 (78%)                              |
| > 250 mg/dL                        | 1 (4%)                             | 0                                    | 1 (9%)                             | 2 (11%)                              | 1 (10%)                            | 2 (22%)                              |
| > 300 mg/dL                        | 1 (4%)                             | 0                                    | 1 (9%)                             | 0                                    | 0                                  | 0                                    |
| > 400 mg/dL                        | 0                                  | 0                                    | 0                                  | 0                                    | 0                                  | 0                                    |

Data are median (25<sup>th</sup>, 75<sup>th</sup> percentiles) or *n* (%). Values shown exclude missing baseline measurements.

<sup>a</sup>Bolus<sub>NORM</sub> = (bolus<sub>ACTUAL</sub> × carbohydrate ratio)/meal size.

<sup>b</sup>Includes the meal boluses, correction boluses, and insulin delivered by the controller.

<sup>c</sup>Area under the curve calculated for each meal and divided by the time.

<sup>d</sup>Hypoglycemic treatments preceded by a red light were not counted as an intervention, and YSI values were not imputed.

CHO, carbohydrate; CV, coefficient of variation.
